# Supplementary material for: Endogenous antigens shape the transcriptome and TCR repertoire in an autoimmune arthritis model
Source: JCI journal article supplement (doi:10.1172/jci174647), 2024-11-26
Supplement: sd11 [file 11]

301 Moved Permanently

# Moved Permanently

The document has moved here.
